# Supplementary material for: Identification of the Genes Required for the Culture of Liberibacter crescens, the Closest Cultured Relative of the Liberibacter Plant Pathogens
Source: Front Microbiol. 2016 Apr 20;7:547. doi: 10.3389/fmicb.2016.00547 (PMC4837290; doi:10.3389/fmicb.2016.00547)
Supplement: Supplementary file 2 [file Table2.xlsx]

## Sheet: S2
Supplemental Table S2: ORFs disrupted by EZ-Tn5. RNA-coding genes are shown in grey.
Disrupted Gene	Gene Position (nt)	EZ-Tn5 Insert Location (nt)
B488_00000	27..1349	767
		1033
B488_00010	1381..3273	1651
		1718
B488_00020	3277..3906	3867
B488_00030	3936..4730	4360
		4380
		4665
B488_00040	4746..5630	5189
B488_00090	11126..12259	11633
		11762
		11929
		12043
		12253
B488_00110	13540..15966	14987
B488_00130	16707..17510	17124
		17149
		17230
		17271
B488_00150	18665..18006	18442
B488_00200	21505..29996	26546
		26689
		26729
		27815
		27823
		27829
		28026
		29357
		29544
		29561
		29578
B488_00250	38091..36307	37785
B488_00260	38231..39211	38512
		38706
B488_00320	45399..46331	46152
		46285
B488_00360	49617..50057	49759
		49767
B488_00460	58444..59565	59117
B488_00530	66568..67701	67115
		67255
		67434
		67633
B488_00540	68576..67725	68049
		68391
		68479
		68518
B488_00590	72911..73516	73234
B488_00630	78227..77061	77375
		78013
B488_00650	79586..80026	79680
		80024
B488_00700	83737..85479	83974
		84213
		84567
B488_00740	91516..90377	91051
B488_00790	95715..97058	95837
		96722
B488_00920	109561..109205	109361
B488_00930	110468..109548	109587
		109796
		109959
		110042
		110093
B488_00980	113720..114835	114632
B488_01000	116381..117661	116614
		116901
		117248
		117618
B488_01010	121179..117718	118419
B488_01020	122430..121438	121673
B488_01030	123210..122437	122759
B488_01150	135262..135864	135544
B488_01170	138571..136712	137240
B488_01190	140103..141545	140426
		140579
		141521
B488_01210	145127..146113	145407
		145669
		146065
		146067
		146088
B488_01230	150034..149660	149889
		149897
B488_01270	155007..156437	155260
		155497
		156273
		156405
B488_01290	159616..158525	159178
		159194
		159297
		159360
B488_01320	163977..164945	164616
B488_01340	165418..166386	165656
		166261
B488_01350	167658..166429	166778
		167238
		167438
		167618
B488_01360	168791..167772	167817
B488_01400	171456..173273	171846
		172871
		172879
B488_01410	174516..173455	174252
B488_01420	174887..176521	175218
		175997
B488_01430	176518..178200	176902
		176917
		178166
B488_01440	178291..179826	178831
		178968
B488_01510	185491..186003	185634
B488_01520	186907..186209	186875
B488_01560	188581..189030	188652
B488_01570	189232..190599	189393
		190152
B488_01600	192569..194176	193388
		193590
		193931
		194010
B488_01680	202377..201226	202224
B488_01690	203779..202412	202445
		202575
		203599
B488_01760	214864..212399	212975
		213092
		213135
		213646
		213988
B488_01780	218191..219774	218866
B488_01790	220026..220769	220291
B488_01800	220780..221523	221385
		221387
B488_01810	222661..221594	221870
		222137
B488_01820	223730..222717	222857
		222962
		223683
B488_01840	225319..224369	224438
		224508
		224592
		224843
B488_01850	226197..225325	225715
B488_01860	226360..227088	226407
		227021
B488_01870	227134..228459	227229
		227412
		228226
B488_01910	230884..231645	231041
		231077
		231453
B488_01920	231709..232869	232357
		232751
		232835
		232843
B488_01950	233151..234437	233506
		233653
		234129
B488_01970	234957..235712	235156
		235499
		235581
B488_01980	236239..236622	236572
B488_01990	236627..237031	236695
B488_02000	237034..237357	237199
		237298
B488_02010	237376..238161	237410
		237469
		238013
		238021
B488_02020	238219..238647	238513
		238617
		238625
B488_02030	238644..239753	238785
		238922
		239064
B488_02040	239750..240277	240178
B488_02050	240274..240993	240497
		240541
		240590
		240929
B488_02070	241573..242274	241582
B488_02150	249774..249244	249337
		249346
B488_02180	253475..252474	252532
B488_02200	255915..254497	254750
		254856
		255214
		255227
B488_02210	256320..255976	256304
B488_02280	262521..263084	262634
		262969
B488_02290	263341..264684	263341
		263544
		264609
B488_02300	264717..265487	265010
B488_02320	266020..266250	266150
B488_02330	266360..267709	267666
B488_02360	269720..269499	269506
B488_02370	271617..269767	270445
		270941
B488_02400	274552..273617	273621
B488_02410	276950..274617	276943
B488_02440	279431..280912	279940
B488_02520	287782..287339	287606
B488_02690	304565..306067	305754
B488_02720	308314..309999	308485
		308752
		309107
		309996
B488_02780	315794..318058	315883
		316826
		317434
B488_02820	321168..323786	321407
		323325
B488_02900	334881..337151	336736
B488_02910	337141..338502	337496
		337846
B488_02930	340482..339250	339618
B488_02990	345868..347133	346316
		346570
B488_03000	347407..349293	348094
		348356
		348461
		348469
B488_03060	352918..351563	352692
B488_03070	354352..353378	353850
		354056
B488_03080	354574..354726	354600
B488_03090	355791..354865	354932
		355169
		355668
B488_03100	356409..357362	356527
B488_03140	361954..361406	361821
B488_03150	363369..361978	363009
		363177
B488_03220	369264..370667	370066
		370465
B488_03230	371839..370841	371195
		371414
B488_03240	373699..371864	372154
		372221
		372478
		372562
		372915
		373470
		373665
		373688
B488_03250	373918..375618	374984
		375064
		375154
		375175
		375240
		375308
B488_03270	376738..377631	377160
		377540
B488_03280	378868..377591	377804
B488_03300	382002..382874	382546
		382798
B488_03360	387214..387546	387343
B488_03370	387777..389066	387792
		388553
		388560
		388746
		388856
B488_03380	389035..390411	389099
		389741
B488_03390	390434..391606	390702
		390976
B488_03400	391647..392159	391705
B488_03410	393732..392209	393579
B488_03450	395975..396991	396634
B488_03510	401738..402628	402523
B488_03600	413827..414537	413936
		414348
B488_03650	418371..418763	418388
		418504
B488_03660	418896..419702	419051
		419260
		419549
B488_03680	420733..421593	420984
B488_03690	423180..421876	422799
B488_03700	424392..423316	424072
		424080
B488_03710	424475..424603	424538
B488_03720	426323..424638	425921
		426040
		426216
B488_03730	426507..430184	426938
		427016
		427400
		427876
		428423
		428726
		429056
		429058
		429314
		429321
		429424
		429930
B488_03740	430452..433649	430816
		431339
		431490
		432279
		432943
		433059
		433172
		433287
B488_03760	434661..433978	434038
B488_03770	436188..434794	435282
		435664
		435762
		435938
		435986
B488_03780	437317..436277	437314
B488_03810	439977..441452	440514
		441336
B488_03820	444348..441481	441529
		443238
		443519
		443897
		444092
B488_03860	451337..449214	449866
		449874
		450215
		450694
		451031
		451041
		451147
		451167
B488_03870	451731..451402	451579
B488_03890	452500..452360	452419
B488_03930	456253..454778	455597
		455681
		456150
B488_03940	457777..456404	456765
		456982
		457418
		457420
B488_03950	459389..457986	458043
		458141
		458481
		458694
		459384
B488_03960	459484..459609	459552
B488_03970	461055..459589	459654
		459819
		460128
		460414
B488_03980	461468..462262	461667
B488_04010	464134..465768	464485
		464605
		465593
B488_04020	465810..467150	466446
		466706
B488_04360	490720..490073	490190
		490301
		490344
		490570
B488_04390	493469..492711	493001
B488_04410	494138..495331	494625
		495228
B488_04420	495422..496726	496323
B488_04460	500070..499546	499579
B488_04470	500573..500151	500558
B488_04480	500806..501387	501020
		501236
B488_04500	502232..504031	502497
		502604
		502668
		503068
B488_04510	504242..505279	504653
		504899
		505042
B488_04540	510510..512477	510932
		512151
B488_04570	514237..513617	514148
B488_04660	524922..523894	523926
B488_04680	525356..525096	525213
		525324
B488_04690	526117..525485	525793
		525898
B488_04700	526937..526110	526433
		526581
		526803
B488_04720	528001..528762	528521
		528529
		528637
		528657
B488_04730	528933..529214	529209
B488_04740	529304..529633	529568
B488_04780	531550..530825	531350
		531386
		531408
B488_04790	532757..532125	532234
B488_04830	535980..535090	535276
		535315
		535614
B488_04870	537657..537782	537714
B488_04880	537902..538135	538099
B488_04890	538234..539286	538552
B488_04900	539261..539734	539518
B488_04910	539749..540249	539874
B488_04920	540391..541521	540542
		541091
B488_04930	541642..541788	541660
		541668
B488_04940	541902..543821	541905
		542089
		543017
		543102
		543177
		543400
		543589
B488_04960	544544..544242	544262
		544298
B488_05000	545170..545307	545260
B488_05010	545439..545564	545458
B488_05020	546003..545584	545585
B488_05040	547143..547451	547381
		547388
B488_05050	547515..548729	547658
B488_05060	548732..550741	548890
		549457
		549525
		550292
		550575
		550653
		550730
B488_05080	551001..552128	551149
		551974
B488_05090	552141..553118	552208
		552611
		552619
B488_05100	553138..553374	553253
B488_05120	553697..554278	553906
		553914
		554102
		554110
B488_05130	554275..554865	554360
B488_05140	554865..556472	554929
		555702
		555712
		555998
B488_05150	556469..556948	556754
		556767
B488_05160	556920..557864	557049
		557059
		557260
		557292
B488_05170	557867..560107	557977
		558041
		558477
		558618
		558849
		558954
		559700
		559882
		560064
B488_05180	560107..561723	560308
		561018
		561459
B488_05190	561761..562474	562187
		562433
		562467
B488_05200	562559..562816	562561
		562769
		562785
B488_05210	562889..563371	563233
		563241
B488_05230	566457..564097	564645
B488_05320	575202..574861	574992
B488_05380	580725..579640	580187
		580675
B488_05400	583185..582592	582619
		582728
		582978
B488_05410	585899..583686	583705
		583713
		583785
		584235
		584425
		584433
		584600
		584772
		585307
		585359
		585871
B488_05420	586853..586092	586264
		586312
		586761
B488_05430	587803..586982	587020
		587037
		587094
		587470
B488_05440	588780..587971	588135
		588148
		588150
		588176
		588564
B488_05460	591105..589570	589784
		590246
		590414
		590573
B488_05470	593347..591227	591534
		592034
		592758
B488_05490	596436..593848	593919
		594001
		594057
		594065
		594367
		594569
		594716
		595605
		596056
		596102
B488_05500	597545..596619	596843
		597015
		597060
B488_05530	599416..600216	599547
		599828
		599929
		599962
		600060
		600068
B488_05540	600354..601280	600839
B488_05550	601465..604053	601627
		601853
B488_05580	604906..605151	605036
B488_05610	609484..608216	608375
		608380
		608624
B488_05620	609825..610871	609954
		610369
B488_05630	611277..612569	611611
		611832
		612155
		612185
B488_05640	612580..613287	612885
		612893
B488_05670	615647..617299	616017
		616155
		616816
B488_05680	617892..617422	617471
B488_05690	618269..621589	619538
		619651
		621401
B488_05720	624861..624142	624388
		624654
		624662
B488_05730	625954..625238	625596
B488_05790	635674..634589	635229
B488_05820	638973..637771	637790
		637873
		638491
B488_05830	640939..638993	639619
B488_05840	641090..642553	641669
		641768
B488_05870	646687..645572	646022
		646052
		646181
		646532
B488_05880	647208..647444	647210
B488_05890	647717..648307	648293
B488_05900	649534..648566	648959
		649130
		649265
B488_05910	649816..650547	650204
		650234
		650218
		650317
		650337
		650520
B488_05920	651657..650935	650939
		651019
		651371
B488_05930	652716..653363	653190
		653249
B488_05990	659891..660757	660648
B488_06000	660751..662426	662276
B488_06020	666518..665199	665474
		666274
B488_06040	667066..668115	667155
		667466
		667468
		667728
		667781
B488_06070	671220..670429	670778
		671207
B488_06080	671935..671282	671393
B488_06090	673508..672510	672857
		673025
		673145
		673182
		673250
		673427
		673496
B488_06100	674506..673505	673737
		673756
		674272
		674398
B488_06110	675321..674503	674729
		674852
B488_06140	678349..677294	678243
		678280
		678288
B488_06150	679418..678369	678806
B488_06170	681994..680142	680158
		680209
		680523
		681881
B488_06210	685500..684907	684934
		684944
B488_06240	688331..689065	688811
B488_06260	690862..690188	690615
B488_06270	691410..691093	691129
B488_06280	691440..691799	691622
		691624
B488_06290	692003..692407	692038
		692056
		692340
B488_06300	692660..693382	693204
B488_06310	693806..694132	694068
B488_06320	694657..694779	694750
B488_06360	697067..698140	697110
B488_06370	698130..699047	698701
		698800
B488_06390	700105..701013	700212
		700220
B488_06450	712428..714438	713820
B488_06480	717668..718858	718510
B488_06490	719113..719619	719336
		719487
B488_06520	721613..721756	721660
B488_06540	723146..724354	723224
		723399
		723407
		723597
		723806
		723819
		724108
		724039
B488_06570	727670..725466	726352
		726480
		726657
		726665
		726686
B488_06590	729005..732433	732233
B488_06610	735283..733636	734465
B488_06640	736944..738083	737248
		737337
B488_06660	739141..738653	738834
		738842
		738844
B488_06680	742076..739911	740522
		740530
		741005
		741013
		741151
		742021
		742037
B488_06710	743509..744261	743610
B488_06720	744242..745921	744479
		744571
B488_06730	746051..745890	745903
B488_06750	748015..749241	748715
		748723
B488_06780	752977..751052	751266
		751275
		752056
		752377
		752534
B488_06790	753921..752980	753070
		753082
B488_06810	758680..755161	755794
		756291
		756711
		757103
		757645
		757927
		758459
B488_06830	759054..761155	759844
B488_06930	772329..770143	770833
		770947
		771533
		771750
B488_06980	776540..775500	776042
		776047
		776408
B488_06990	777671..776706	777118
B488_07010	778622..777777	777877
		778239
		778604
B488_07020	779660..779028	779123
B488_07030	780076..782103	781363
		781660
		781657
B488_07040	782100..782702	782276
		782568
B488_07050	782703..785960	782800
		783239
		783385
		784724
		784784
		785595
		785811
		785945
B488_07060	786208..787233	786304
		786566
		786591
		786840
B488_07180	801715..801278	801289
B488_07200	803199..802765	803095
B488_07280	811402..812325	812021
B488_07290	812714..813667	813155
		813464
B488_07300	814046..815713	814234
		815104
		815685
B488_07310	816308..815772	815778
		816094
B488_07370	822010..820616	821143
		821151
B488_07570	842777..842646	842762
		842770
B488_07580	842767..843057	842787
B488_07590	843069..843569	843331
		843561
B488_07600	843572..845116	844636
B488_07610	845193..845561	845475
B488_07620	845663..846019	845912
B488_07630	846049..846765	846357
		846539
B488_07640	847391..846792	847343
B488_07670	848579..848043	848104
B488_07690	849123..848827	849017
		849100
B488_07700	849617..849126	849213
B488_07710	850544..849699	850001
		850051
		850075
		850079
		850138
		850382
B488_07730	852374..851202	851277
		851295
		851884
		851908
		851914
		852195
B488_07740	853548..852361	852571
		852816
		853367
		853422
B488_07750	854058..853579	853740
		853758
B488_07760	855686..854055	854482
		855549
B488_07770	856279..855689	856123
B488_07780	856854..856276	856579
B488_07810	859205..858258	858926
		859042
B488_07820	860133..859621	859862
B488_07830	862340..860403	860839
		861187
		862265
B488_07840	863693..862344	862636
B488_07850	863937..863662	863869
B488_07890	866361..866128	866285
B488_07900	867118..866345	866605
B488_07910	868545..867115	868170
B488_07930	870229..869081	869686
B488_07940	870734..871543	870748
		870857
		870940
		871465
B488_07950	871540..872424	871610
		872239
B488_07960	872421..873332	872446
		872661
B488_07970	873692..873381	873508
		873511
B488_07980	874201..873689	873962
		874070
B488_07990	874986..874198	874340
B488_08060	878742..879464	878817
		878950
B488_08070	879640..880023	879670
		879678
B488_08120	882777..883097	882809
B488_08140	883666..884616	883892
		884085
		884204
		884213
		884456
B488_08150	884740..885870	884970
		885553
B488_08210	892425..894596	893334
		893450
		894093
		894228
B488_08220	894849..895556	895036
B488_08230	895601..896926	896728
B488_08240	897786..896971	897222
		897747
B488_08250	898027..900336	898290
		898799
		899063
B488_08280	905156..902811	903516
		904591
B488_08290	905398..906549	906041
		906049
B488_08300	906550..908730	906575
		906610
		906746
		907203
		907211
		907429
		907483
		907868
		908258
		908298
		908306
B488_08310	908733..909341	909196
B488_08320	909561..910091	909673
B488_08340	910774..911127	910818
B488_08350	911412..912026	911589
		911597
		911675
B488_08360	913362..912199	913143
B488_08370	914679..913362	913731
		914053
		914648
B488_08390	916789..915332	915419
		916165
		916173
B488_08400	917518..916805	916853
		917503
B488_08420	918748..920577	919833
		920397
		920399
B488_08570	940504..939497	939889
		940057
B488_08580	941571..940504	940765
		940773
		941144
B488_08600	943587..942577	942781
		942875
		942901
		943231
		943372
		943527
B488_08620	943740..943865	943848
B488_08800	959229..958420	958706
		958912
		958995
B488_08830	961131..962159	961372
		961380
B488_08850	963502..964650	963517
B488_08880	967098..966265	966333
		966548
B488_08900	968162..967470	967991
		968121
B488_08910	968891..968631	968730
B488_08930	970750..969842	970438
B488_09000	974641..975318	974797
		974805
		974807
		975012
		975029
B488_09020	976488..976264	976269
B488_09090	978589..979611	978598
B488_09120	982629..983237	982800
		982968
B488_09210	993084..993734	993178
B488_09220	993725..994681	993766
		994101
		994284
B488_09230	995940..994738	994929
		995587
B488_09240	996600..998042	997325
		997881
B488_09250	998008..998697	998098
B488_09270	1000795..999674	1000290
		1000645
B488_09280	1001877..1000801	1001814
B488_09290	1002175..1002708	1002640
B488_09330	1005585..1008521	1008430
B488_09340	1009294..1008764	1008826
B488_09380	1011246..1010503	1010996
		1011005
		1011037
B488_09390	1013324..1011243	1011457
		1012063
		1012562
		1013292
		1013300
		1013306
B488_09440	1016037..1014967	1015023
		1015509
B488_09450	1017489..1016041	1016239
		1016837
		1017111
		1017246
B488_09470	1019562..1018891	1019120
		1019191
B488_09490	1021399..1020116	1020140
		1021066
B488_09500	1022619..1021396	1021783
		1022490
B488_09510	1023780..1022623	1023374
B488_09520	1024418..1023795	1024046
B488_09530	1025944..1024610	1024928
		1025028
		1025102
		1025354
B488_09580	1031003..1032157	1031362
		1031485
		1031694
		1031697
		1031828
B488_09600	1034798..1033905	1034631
B488_09640	1041527..1040304	1041209
B488_09670	1043628..1042825	1042956
		1042959
		1043368
		1043376
		1043549
B488_09800	1060709..1060005	1060174
		1060276
B488_09860	1072860..1074035	1073746
B488_09870	1074057..1077152	1074296
		1074564
		1074947
		1075762
		1075906
B488_09900	1080405..1081529	1080991
		1081147
B488_09910	1081526..1082221	1081779
B488_09920	1083632..1082340	1082577
		1083201
		1083364
B488_09960	1090806..1088950	1089199
B488_09970	1092106..1091246	1091572
B488_09990	1094083..1093028	1093208
		1093354
		1093563
		1093684
B488_10000	1094664..1094092	1094117
		1094125
B488_10010	1095097..1095492	1095127
		1095172
B488_10040	1099448..1099804	1099665
B488_10060	1101934..1100672	1100851
		1101188
B488_10170	1112071..1112919	1112871
B488_10240	1120554..1119241	1119285
		1120292
		1120300
B488_10250	1122632..1121298	1121708
		1122545
		1122551
		1122631
B488_10260	1123823..1123083	1123431
		1123788
B488_10270	1124701..1123820	1123976
B488_10280	1126066..1124720	1125990
		1126061
B488_10290	1126971..1126069	1126216
B488_10370	1133629..1132055	1132670
		1132798
		1133242
B488_10390	1135954..1135355	1135519
		1135789
B488_10410	1137557..1136931	1137052
B488_10470	1140698..1141690	1140786
B488_10520	1147307..1146093	1146410
		1147176
B488_10530	1148116..1147586	1147646
		1147859
B488_10540	1148473..1149549	1148499
		1148507
		1149236
		1149368
B488_10550	1149539..1150207	1149823
B488_10610	1157408..1155909	1155954
		1156014
		1156384
		1156906
		1157348
B488_10620	1157890..1157537	1157669
B488_10680	1165515..1163695	1164219
		1165100
B488_10700	1168244..1166716	1166865
		1167322
		1167533
		1167970
B488_10710	1170429..1168244	1168544
		1168745
		1169260
B488_10740	1172587..1173210	1173192
B488_10750	1173797..1173261	1173342
		1173712
B488_10760	1174385..1173810	1174181
B488_10780	1176530..1175670	1175755
B488_10800	1178225..1178710	1178533
B488_10810	1178707..1179519	1178716
		1179396
B488_10820	1179516..1180439	1179821
		1179956
		1180098
		1180368
B488_10830	1180432..1180896	1180545
B488_10900	1186607..1185273	1185304
		1185312
B488_10910	1187291.. 1186776	1186873
		1186885
B488_10960	1193204..1195552	1194416
		1194485
		1194776
		1195075
		1195378
B488_10970	1196266..1195589	1195859
		1196236
B488_11040	1203260..1204704	1203332
		1203742
		1204357
B488_11070	1207001..1206489	1206671
		1206760
		1206830
B488_11120	1210729..1211403	1210807
B488_11130	1211522..1212766	1212413
		1212460
B488_11140	1212790..1213575	1212822
		1212998
		1213229
		1213312
		1213327
		1213347
		1213543
B488_11150	1214158..1215792	1214295
		1214918
		1215065
		1215461
		1215469
B488_11180	1218690..1217557	1217946
		1218588
B488_11210	1221232..1221843	1221307
		1221582
B488_11220	1221883..1222652	1222631
B488_11230	1222885..1223886	1223601
B488_11250	1225924..1224824	1225309
		1225535
		1225614
		1225622
B488_11260	1226748..1226020	1226085
B488_11280	1228499..1227744	1228494
B488_11310	1230054..1230350	1230195
		1230330
B488_11360	1234340..1235521	1234435
		1235516
B488_11420	1239316..1240113	1239533
		1239640
		1239650
		1239707
		1240033
B488_11440	1241495..1241638	1241602
B488_11470	1243389..1244257	1243413
		1243653
B488_11480	1245754..1244441	1244882
B488_11490	1246947..1245790	1245823
		1246874
B488_11520	1249371..1251296	1250690
		1250698
		1251060
B488_11570	1257514..1257350	1257468
B488_11590	1258175..1259017	1258344
		1258500
		1258598
B488_11600	1260412..1259069	1259384
		1259871
		1259887
		1259916
		1260128
		1260273
		1260363
B488_11610	1264564..1260560	1260871
		1262506
		1263009
		1263346
B488_11620	1266721..1264757	1264769
		1264777
		1264787
		1265089
		1265670
		1265760
		1266466
B488_11630	1267109..1266858	1266962
B488_11650	1270434..1268599	1268715
		1270195
		1270239
B488_11660	1270777..1272996	1271714
		1272106
		1272550
		1272557
B488_11680	1274905..1273922	1274780
B488_11700	1276369..1277394	1276903
		1276983
		1276996
		1277141
		1277278
B488_11720	1279325..1278480	1279172
B488_11810	1290240..1288042	1288888
		1288935
		1289629
		1289908
B488_11830	1291681..1292307	1291771
B488_11840	1292316..1294127	1292688
		1292923
		1293846
		1293848
B488_11850	1294794..1294369	1294625
B488_11860	1295706..1295236	1295521
B488_11900	1299840..1300715	1300188
		1300196
		1300463
B488_11940	1304570..1303383	1303539
		1304289
		1304303
B488_11950	1305218..1304577	1304613
B488_11960	1305945..1305211	1305770
		1305881
B488_11970	1306112..1307200	1306251
		1306335
		1306523
		1306872
		1306976
B488_11990	1308227..1309516	1308536
		1308687
		1309167
B488_12000	1309687..1310139	1309741
B488_12020	1311783..1313972	1311936
		1312379
		1312586
		1312627
		1312975
B488_12080	1319971..1321026	1320303
		1320449
B488_12120	1325822..1323684	1325208
		1325313
B488_12130	1327105..1325819	1326078
B488_12150	1328262..1327747	1328089
B488_12160	1329562..1328549	1328935
		1329444
B488_12170	1330896..1329682	1330284
		1330384
		1330883
B488_12240	1337080..1337835	1337170
B488_12250	1339548..1337884	1338146
		1338241
		1338929
		1339138
		1339148
		1339237
		1339482
B488_12260	1340216..1339545	1339956
		1340131
		1340209
B488_12270	1340703..1340218	1340333
		1340622
B488_12280	1342171..1342788	1342344
B488_12300	1348317..1343572	1343599
		1343607
		1344918
		1345714
		1345722
		1345941
		1345976
		1346477
		1346517
		1347512
B488_12330	1352576..1350948	1351733
		1351740
		1352089
B488_12400	1356835..1356047	1356345
		1356455
B488_12440	1359522..1360337	1359673
		1359680
		1360226
B488_12460	1360988..1361719	1361250
		1361433
B488_12500	1366329..1365937	1365991
		1365983
B488_12510	1367821..1366424	1367244
B488_12550	1369338..1370402	1370056
B488_12570	1372253..1370790	1371461
		1371479
		1371880
B488_12580	1372829..1373326	1373320
B488_12700	1385716..1386261	1385969
B488_12760	1390511..1391014	1390967
B488_12770	1391807..1391121	1391254
		1391294
		1391337
B488_12780	1393572..1391941	1393148
B488_12790	1394651..1393710	1394080
		1394156
B488_12800	1395697..1394703	1395050
		1395058
		1395207
		1395329
B488_12810	1397153..1395708	1395859
		1396080
		1396872
		1397088
B488_12820	1398466..1397183	1397304
		1397712
		1398373
		1398381
B488_12830	1399283..1398504	1398506
		1398731
		1399059
		1399106
B488_12840	1400718..1399297	1399312
		1399359
		1399943
		1400230
		1400316
		1400345
B488_12920	1404569..1404378	1404383
		1404457
		1404531
B488_12940	1406152..1405970	1406087
B488_12950	1406832..1406164	1406276
B488_12990	1412350..1411124	1411190
B488_13030	1414732..1415667	1414828
		1414859
		1414984
		1415221
B488_13070	1418638..1417832	1418418
		1418597
B488_13080	1419828..1418638	1418893
		1419471
B488_13090	1421220..1419862	1420201
		1420266
		1420404
B488_13100	1422226..1421228	1421692
B488_13110	1422821..1422243	1422249
		1422374
		1422604
		1422787
B488_13120	1424383..1422821	1423430
		1423885
		1423980
		1424205
		1424207
B488_13130	1425219..1427933	1425365
		1425447
		1425532
		1426418
		1426831
		1426839
		1427462
		1427632
B488_13150	1429389..1428913	1428977
		1429042
B488_13160	1430191..1429409	1429898
B488_13240	1437650..1438660	1438016
		1438260
		1438630
B488_13250	1438632..1439774	1439117
		1439307
		1439468
B488_13260	1439771..1440409	1439807
		1440305
B488_13270	1440406..1441686	1440491
		1440674
		1440751
		1440904
		1441126
		1441284
		1441605
		1441618
		1441676
B488_13280	1441683..1442672	1441931
		1442190
		1442284
B488_13290	1443226..1442801	1442985
		1443081
		1443089
B488_13300	1444109..1443354	1443578
		1443932
		1443968
		1444031
B488_13340	1447204..1447911	1447546
B488_13360	1450415..1451413	1451408
B488_13370	1454557..1451492	1451615
		1451775
		1452149
		1453106
		1454109
		1454210
B488_13380	1455603..1454554	1455363
B488_13390	1456733..1455621	1455758
		1456112
		1456498
B488_13420	1457995..1460208	1458601
		1458947
		1458984
		1459132
		1459144
		1459557
		1459663
		1459746
B488_13430	1460210..1461415	1460470
		1461076
		1461169
B488_13470	1469340..1468030	1468385
		1469154
B488_13490	1470072..1470677	1470165
		1470306
		1470413
B488_13500	1470817..1471467	1470850
		1471274
		1471347
B488_13510	1471509..1472258	1471595
		1471702
		1471794
		1471925
B488_13520	1472248..1473024	1472522
		1472714
B488_13570	1477182..1479000	1477768
		1477793
		1477848
		1478378
		1478871
B488_13580	1478981..1479448	1479107
B488_13590	1479719..1480120	1479930
		1479933
B488_13630	1484006..1487152	1484247
		1484458
		1484856
B488_13640	1487142..1490681	1488735
		1489786
		1490344
B488_13680	1493686..1494267	1493725
		1494070
B488_13710	1497868..1498350	1498169
		1498179
		1498257
B488_13840	235944..235871	235912
B488_13860	287069..286997	287008
B488_13890	326080..327586	327264
B488_13920	1069287..328241	328594
B488_14140	1071447..1069942	1071058
