# Supplementary material for: Identification of the Genes Required for the Culture of Liberibacter crescens, the Closest Cultured Relative of the Liberibacter Plant Pathogens
Source: Front Microbiol. 2016 Apr 20;7:547. doi: 10.3389/fmicb.2016.00547 (PMC4837290; doi:10.3389/fmicb.2016.00547)
Supplement: Supplementary file 3 [file Table3.xlsx]

## Sheet: S3
Supplemental Table S3: ORFs disrupted by pUT-Tn5. RNA-coding genes are shown in grey.
Disrupted Gene	Gene Position (nt)	pUT-Tn5 Insert Location (nt)
B488_00000	27..1349	630
		1129
		1132
		1135
		1137
		1147
B488_00010	1381..3273	2047
		3096
B488_00020	3277..3906	3329
		3331
		3332
		3333
		3334
		3337
		3350
		3500
		3788
		3792
		3795
		3796
B488_00030	3936..4730	4000
		4311
		4312
B488_00040	4746..5630	4821
B488_00070	9886..7259	8089
		8115
		8296
		8579
		9448
		9586
B488_00090	11126..12259	11309
		11945
		11949
B488_00100	13107..12532	12672
		13042
B488_00110	13540..15966	14598
		14857
		14858
B488_00120	16027..16656	16239
		16431
B488_00140	17965..17522	17665
B488_00150	18665..18006	18146
		18163
		18453
B488_00160	19307..18768	18949
		18959
		19088
		19144
B488_00180	20789..19821	19859
		19938
		20472
B488_00190	20916..21389	21177
B488_00200	21505..29996	22443
		22533
		23876
		24949
		25050
		26899
		28613
		28614
		28615
		29254
		29307
		29309
B488_00210	31191..30127	30432
		30433
B488_00220	32824..31268	31555
		32556
B488_00230	33352..34611	33575
B488_00240	36192..34608	35817
		35984
B488_00250	38091..36307	36310
		37158
		37642
		37666
		37844
B488_00260	38231..39211	38451
B488_00280	39832..40374	39953
B488_00300	42328..44958	42588
		43547
		43849
		44262
		44263
		44600
B488_00320	45399..46331	45524
B488_00350	46994..49105	48356
B488_00370	51356..50166	50272
B488_00380	52248..51382	52057
B488_00390	52927..52469	52576
B488_00410	54462..55349	55175
B488_00420	55456..56175	55776
		56164
B488_00430	56267..56782	56274
		56570
		56750
		56754
B488_00460	58444..59565	58528
B488_00470	59726..62062	59785
B488_00480	62106..63173	62490
		62491
		62492
		62493
		62495
		62505
		62604
B488_00520	65319..66500	65589
		66345
B488_00530	66568..67701	66645
		66646
		66647
		66648
		66649
		66650
		66651
		66652
		66653
		66654
		66655
		66656
		66657
		66658
		66659
		66660
		66661
		66662
		66663
		66664
		66665
		66666
		66667
		66668
		66669
		66670
		66671
		66765
		67660
B488_00540	68576..67725	67963
B488_00560	70160..69525	69839
B488_00570	70598..72316	70639
		71421
		71815
B488_00590	72911..73516	73019
		73020
B488_00600	75066..73639	73785
		73869
		74651
		74653
		74914
B488_00610	76071..75091	76051
B488_00640	79068..78427	78521
B488_00650	79586..80026	79724
B488_00660	81364..80392	81041
B488_00690	82611..83630	83075
		83214
		83215
		83248
B488_00700	83737..85479	84429
		84430
		84431
		84435
		84436
		84437
		84444
		84445
		84448
		84536
		84794
B488_00710	85803..86570	85960
B488_00720	87585..86584	86872
B488_00730	90206..87761	88286
		88852
		89763
		90034
B488_00740	91516..90377	90430
		91223
B488_00750	92204..94756	92683
		93673
		94062
B488_00760	94741..94857	94844
B488_00790	95715..97058	96408
		96437
		96818
		96828
		96829
		96830
		96831
		96832
		96833
		96834
		96835
		96836
		96837
		96838
		96839
		96840
		96841
		96842
		96843
		96844
		96845
		96846
		96847
		96848
		96849
		96850
		96851
		96852
B488_00810	98261..99172	99128
B488_00820	99333..101330	99797
		100109
B488_00830	101351..101986	101369
		101952
B488_00850	103306..102506	102918
B488_00860	103958..103296	103354
B488_00900	105946..108861	106867
		107068
		107998
B488_00950	111996..113111	112120
		112354
		112781
B488_00970	113348..113665	113509
B488_00980	113720..114835	114078
B488_00990	114981..116384	114998
		115523
B488_01000	116381..117661	116659
		116955
B488_01010	121179..117718	118819
		119946
		120203
		120564
		120996
B488_01020	122430..121438	122346
		122347
B488_01050	124430..123425	124034
B488_01070	126653..125466	125801
B488_01090	128055..127684	127738
		128040
B488_01100	128235..129587	129079
		129093
		129376
B488_01110	129604..130239	129777
		129778
		129779
		129780
B488_01120	130405..132111	131340
		131559
		131670
		131735
B488_01160	135926..136645	135936
		136312
B488_01170	138571..136712	136928
		136987
		137498
		137893
B488_01190	140103..141545	140805
		141346
		141347
B488_01200	142037..144739	142166
		144652
B488_01210	145127..146113	145588
B488_01220	146864..149488	147320
		147321
		147329
		148580
		149196
B488_01230	150034..149660	149928
B488_01240	153174..150277	150546
		150561
		150928
		151098
B488_01250	154006..153335	153412
B488_01270	155007..156437	155116
		155125
		155126
		155127
		155128
		155129
		155130
		155131
		155133
		155140
		155143
		155145
		155692
B488_01280	156587..158392	157939
		158058
B488_01290	159616..158525	159290
B488_01300	159616..160092	159858
B488_01310	163767..160270	160710
		160711
		162198
B488_01320	163977..164945	164653
		164865
		164866
		164903
B488_01340	165418..166386	165657
		166094
B488_01360	168791..167772	168160
B488_01390	170283..171161	170327
		170515
		171036
		171037
		171077
B488_01400	171456..173273	171952
		171959
B488_01410	174516..173455	173479
B488_01420	174887..176521	175028
		175029
		175030
		175031
		175032
		175033
		175034
		175035
		175036
		175037
		175038
		175039
		175040
		175041
		175042
		175043
		175044
		175045
		175046
		175047
		175048
		175049
		175050
		175051
		175052
		175054
		175125
		175448
B488_01430	176518..178200	176793
		177967
B488_01440	178291..179826	178907
		179268
		179269
B488_01450	179922..181022	180032
		180389
		180850
B488_01470	181716..181267	181509
B488_01490	183892..182975	183407
B488_01500	185128..183938	184611
		184612
B488_01550	187715..188323	187833
B488_01570	189232..190599	189303
		189933
		189934
		189935
		189936
		189937
		189938
		189939
		189940
		189941
		189942
		189943
		189944
		189945
		189946
		189948
		189949
		189951
		189953
		190365
		190369
		190370
		190371
		190374
		190375
		190376
		190377
		190378
		190379
		190381
		190382
		190383
		190384
		190387
		190388
B488_01590	191509..192519	191568
B488_01600	192569..194176	192641
		193675
		193693
B488_01610	194392..194802	194576
B488_01630	196111..196809	196760
B488_01640	197092..196832	196965
B488_01650	198743..197369	197536
		197537
		197539
		198603
B488_01670	199867..201057	200415
		200443
		200817
B488_01680	202377..201226	201964
B488_01700	203986..205773	204813
		205758
B488_01710	206606..206004	206059
B488_01720	207547..206984	207451
		207541
B488_01740	208950..210503	210226
B488_01750	210651..212213	211415
		212089
B488_01760	214864..212399	213230
		213280
		213281
		213282
		213504
		213834
		214637
B488_01770	217230..216286	216696
		216697
		216698
		216699
		216700
		216701
		216702
		216703
		216708
		216709
		216710
		216711
		216714
		216717
		216720
		216837
B488_01780	218191..219774	218622
		218708
		218933
		219518
B488_01800	220780..221523	221148
B488_01810	222661..221594	222560
B488_01820	223730..222717	223067
		223362
		223363
		223364
		223365
		223366
		223367
		223368
		223375
		223376
		223383
		223539
B488_01840	225319..224369	224574
		224781
		224841
		224842
		224843
		224844
		224845
		224846
		224847
		224848
		224849
		224850
		224851
		224852
		224853
		224854
		224855
		224856
		224857
		224858
		224860
		224861
		224862
		224863
		224864
		224865
		224867
		224873
B488_01870	227134..228459	227361
B488_01890	229285..229172	229177
B488_01900	229622..230890	229704
B488_01910	230884..231645	231463
B488_01950	233151..234437	233922
B488_01960	234451..234960	234878
B488_01970	234957..235712	235543
B488_01990	236627..237031	236836
		236927
B488_02000	237034..237357	237040
		237041
		237042
		237043
		237044
		237045
		237046
		237047
		237049
		237050
		237051
		237052
		237053
		237054
		237056
		237058
		237059
		237060
		237062
		237071
		237072
		237073
		237074
B488_02010	237376..238161	237490
B488_02020	238219..238647	238642
B488_02030	238644..239753	238694
		238698
		238783
		238838
		239143
		239168
B488_02060	241031..241543	241487
B488_02080	242655..242491	242601
		242631
B488_02090	244214..242949	243982
B488_02130	247788..247039	247400
		247459
B488_02140	248286..249131	248646
B488_02160	250509..251402	250752
B488_02180	253475..252474	252715
		252938
B488_02200	255915..254497	255093
		255187
		255614
B488_02230	257001..257933	257772
B488_02240	259297..258203	259045
B488_02250	260406..259287	259308
B488_02260	261012..260566	260957
B488_02270	261200..262540	262326
B488_02290	263341..264684	263928
		264095
		264378
		264479
B488_02300	264717..265487	265275
		265276
		265277
		265280
		265284
B488_02330	266360..267709	267207
B488_02370	271617..269767	271437
B488_02410	276950..274617	275792
		276684
		276708
B488_02430	279187..278093	278376
B488_02440	279431..280912	279656
		280067
		280839
		280840
B488_02470	282205..283542	283436
		283437
		283438
		283439
		283440
		283441
		283466
		283467
		283472
		283474
		283478
		283480
		283490
		283491
B488_02490	283855..284265	284029
B488_02500	284348..285502	285147
B488_02510	286729..285827	285991
		286472
B488_02520	287782..287339	287400
		287735
B488_02530	288875..287901	288312
B488_02540	289733..288888	289116
		289176
B488_02570	292765..293130	293113
B488_02580	293121..293690	293598
B488_02590	293698..294300	293711
		293774
		294268
B488_02600	294346..295536	294811
B488_02610	295590..296474	296165
B488_02630	297890..299962	298088
		298089
		298492
		298868
B488_02640	299981..301021	300341
B488_02650	301067..301552	301500
B488_02670	302254..302562	302562
B488_02680	302573..304565	302786
B488_02700	306085..307530	306572
		306732
		307514
B488_02710	307533..308309	307937
		308186
B488_02720	308314..309999	308568
		308569
		308570
		308571
		308572
		308573
		308574
		308575
		308577
		308578
		308580
		308581
		308583
		308585
		308586
		308587
		308588
		308659
		308662
		309120
		309472
		309653
		309777
		309948
		309950
B488_02740	311513..312811	311543
		312614
B488_02770	314455..315708	314587
B488_02780	315794..318058	316487
		316488
		316489
		316490
		316491
		316492
		316493
		316494
		316503
B488_02790	318077..319150	318104
		318349
		319148
B488_02800	319191..320036	319995
B488_02810	320387..321019	320986
B488_02820	321168..323786	321470
		322454
		322661
		323513
B488_02830	325583..323817	324782
B488_02900	334881..337151	336272
B488_02930	340482..339250	340195
		340284
B488_02960	342423..343076	342788
B488_02980	345378..344629	345027
		345028
B488_02990	345868..347133	346375
B488_03000	347407..349293	347989
		348548
B488_03030	349880..350038	350026
		350032
B488_03050	350333..351322	350478
B488_03060	352918..351563	351740
B488_03070	354352..353378	354293
B488_03090	355791..354865	355186
		355187
		355188
		355190
		355204
		355207
		355673
B488_03100	356409..357362	356463
		356790
B488_03110	358865..357486	358278
B488_03120	359734..359009	359144
		359379
B488_03130	361239..359752	360865
B488_03150	363369..361978	362200
		362886
		362887
		362995
B488_03160	364592..363444	363869
B488_03180	366795..366220	366712
B488_03190	367694..366813	367242
		367243
		367244
		367245
		367246
		367247
		367248
		367249
		367250
		367251
		367252
		367255
		367259
		367505
B488_03220	369264..370667	369562
		369624
		369625
		369629
B488_03230	371839..370841	370873
		371324
B488_03250	373918..375618	373923
		374315
		375298
B488_03260	375693..376745	376053
B488_03270	376738..377631	377112
		377298
B488_03280	378868..377591	378268
		378390
		378632
B488_03290	381766..379073	379898
		380521
		381479
B488_03300	382002..382874	382785
B488_03310	382912..384150	383375
B488_03380	389035..390411	389335
		389824
B488_03390	390434..391606	390636
		390897
		391012
B488_03410	393732..392209	393067
		393254
B488_03440	395325..395936	395352
B488_03450	395975..396991	396088
		396694
B488_03460	397297..397998	397304
B488_03480	398513..399553	398768
B488_03490	399648..400940	400504
		400842
B488_03500	401069..401599	401295
		401311
B488_03510	401738..402628	402480
B488_03520	402640..403935	403275
B488_03530	404032..405972	404149
B488_03540	406193..407539	406507
		406580
		406633
		406783
		406784
		406785
		406786
		407373
B488_03570	409855..408740	408797
		408813
B488_03580	412737..409876	410458
		411076
B488_03600	413827..414537	413974
B488_03620	415562..416110	415721
B488_03640	417298..418269	417437
		417473
		417764
		417765
B488_03670	420489..419815	419958
B488_03690	423180..421876	421898
B488_03720	426323..424638	425488
		425489
		425490
		425491
		425492
		425494
		425497
		425499
B488_03730	426507..430184	426632
		427921
		427922
		427923
		427924
		427925
		427926
		427927
		427928
		427929
		427930
		427931
		427932
		427933
		427934
		427935
		427936
		427937
		427938
		427939
		427940
		427941
		427942
		427943
		427944
		427945
		427946
		427948
		427958
		427959
		428243
		428244
		428250
		428251
		428254
		428255
		428256
		428258
		428573
		428574
		428578
		428579
		428580
		428582
		428583
		428584
		428585
		428586
		428587
		428588
		428589
		428590
		428591
		428592
		428593
		428594
		428647
		428903
		428904
		428911
		428914
		428916
		428917
		428919
		429032
		429932
B488_03740	430452..433649	431479
B488_03760	434661..433978	434103
B488_03770	436188..434794	435025
		435697
		435698
		435699
		435700
		435701
		435702
		435703
		435704
		435705
		435706
		435707
		435708
		435709
		435710
		435711
		435712
		435713
		435714
		435715
		435716
		435717
		435718
		435719
		435905
B488_03780	437317..436277	436386
		436993
B488_03790	439107..437695	437825
		438171
B488_03810	439977..441452	440369
B488_03820	444348..441481	442840
		444190
B488_03840	445285..448038	446096
		446291
		447001
B488_03850	448555..449055	448645
		448884
		448904
		448965
B488_03860	451337..449214	449502
B488_03880	451980..452114	452046
B488_03910	453119..454006	453475
B488_03920	454806..454063	454233
B488_03940	457777..456404	456876
B488_03950	459389..457986	458319
B488_03960	459484..459609	459521
B488_03970	461055..459589	460482
		460483
		460484
		460485
		460486
		460487
		460488
		460490
		460491
		460493
		460496
		460637
		460638
		460639
		460640
		460641
		460642
		460643
		460644
		460645
		460646
		460647
		460648
		460649
		460650
		460651
		460652
		460653
		460654
		460655
		460656
		460657
		460658
		460659
		460660
		460661
		460662
		460663
		460664
B488_03980	461468..462262	461574
B488_03990	462301..463167	462567
		462865
		462895
B488_04010	464134..465768	464877
		465269
		465354
		465355
		465356
		465358
		465359
		465360
		465361
		465363
		465364
		465365
		465369
		465370
		465371
		465372
B488_04020	465810..467150	466892
B488_04070	471770..473866	472326
		473347
B488_04080	473931..475106	475017
B488_04100	475621..476268	475664
		476187
B488_04110	476279..476899	476610
B488_04140	478113..478391	478372
B488_04160	478786..479502	479030
B488_04210	480946..481254	481054
B488_04220	481247..481804	481457
B488_04260	483138..483500	483231
B488_04270	483561..484133	483607
B488_04300	484943..486283	485102
		486033
		486054
B488_04380	492345..491512	491837
B488_04400	493691..493891	493710
B488_04410	494138..495331	494273
		494277
		494278
		494279
		494281
		494282
		494284
		494286
		494295
		494620
		494853
B488_04450	497210..499009	497331
		497357
		497980
		498173
		498656
		498733
B488_04500	502232..504031	502604
		503198
		503365
		503473
		503477
		503478
		503479
		503480
		503481
		503482
		503483
		503484
		503486
		503487
		503489
		503490
		503491
		503496
		503498
		503500
		503595
		503749
B488_04510	504242..505279	504929
		504930
B488_04530	510197..508806	509470
		510042
B488_04540	510510..512477	510683
		510840
		510841
		510842
		510843
		510844
		510845
		510846
		510847
		510848
		510849
		510850
		510851
		510852
		510853
		510854
		510855
		510856
		510857
		510858
		510859
		510860
		510861
		510862
		510863
		510864
		510865
		510867
B488_04550	513441..512506	512797
		512848
B488_04580	514321..515460	514423
		515035
		515036
B488_04590	516649..515483	516256
B488_04600	518831..516750	517383
		517460
		517489
B488_04610	519174..519944	519743
B488_04620	520024..520404	520093
		520349
B488_04660	524922..523894	523989
B488_04670	525099..524926	524939
		524940
B488_04720	528001..528762	528001
		528241
		528649
		528650
		528654
B488_04730	528933..529214	529205
B488_04740	529304..529633	529382
		529383
B488_04760	530606..530424	530522
B488_04790	532757..532125	532367
		532371
		532374
		532467
B488_04800	532984..532808	532914
B488_04830	535980..535090	535226
		535519
		535575
		535576
		535577
		535578
		535579
		535580
		535581
		535582
		535583
		535584
		535585
		535586
		535587
		535588
		535589
		535590
		535591
		535592
		535593
		535594
		535595
		535830
B488_04840	536456..536205	536217
B488_04880	537902..538135	538025
		538115
B488_04890	538234..539286	539102
B488_04900	539261..539734	539484
		539625
		539642
		539643
		539646
B488_04910	539749..540249	540085
		540194
B488_04940	541902..543821	543679
B488_04950	543859..544164	544046
		544063
		544088
B488_04970	544903..544655	544804
B488_05040	547143..547451	547432
		547433
		547434
B488_05050	547515..548729	548074
		548075
		548076
		548077
		548078
		548079
		548080
		548081
		548082
		548083
		548084
		548085
		548086
		548087
		548088
		548089
		548090
		548092
		548093
		548094
		548095
		548097
		548099
		548100
B488_05060	548732..550741	549857
		549949
		549950
		549951
		549952
		549953
		549954
		549955
		549956
		549957
		549958
		549959
		549960
		549961
		549962
		549963
		549964
		549965
		549966
		549967
		549968
		549969
		549970
		549971
		549972
		549973
		549974
B488_05080	551001..552128	551017
B488_05090	552141..553118	552660
		553054
		553055
B488_05110	553374..553700	553652
B488_05120	553697..554278	553764
B488_05130	554275..554865	554709
B488_05150	556469..556948	556484
		556487
		556556
		556888
		556908
B488_05160	556920..557864	557244
		557245
		557247
		557248
		557249
		557250
		557251
		557254
		557256
B488_05170	557867..560107	559729
		559730
		559731
		559732
		559733
		559734
		559735
		559736
		559737
		559738
		559739
		559740
		559741
		559742
		559743
		559744
		559745
		559746
		559747
		559748
		559749
		559750
		559751
		559752
		559753
		559754
B488_05180	560107..561723	561300
B488_05190	561761..562474	562080
		562113
		562442
B488_05200	562559..562816	562764
B488_05210	562889..563371	563319
		563321
B488_05260	568629..569246	568872
B488_05270	569284..570210	569805
B488_05280	571783..570542	571062
B488_05290	572212..571874	571961
		571962
B488_05310	574775..572547	572812
		574552
B488_05320	575202..574861	574991
B488_05330	575986..575306	575419
		575883
		575884
B488_05350	577095..576325	576462
		576877
B488_05360	578671..577370	577909
		578035
		578496
B488_05380	580725..579640	579760
B488_05400	583185..582592	582742
		582803
B488_05410	585899..583686	583910
		583911
		583912
		583913
		583915
		584649
		584652
		584653
		584654
		584655
		584656
		584665
		584669
		584867
		584952
		585184
		585203
		585204
		585205
		585206
		585207
		585208
		585209
		585210
		585211
		585212
		585213
		585214
		585215
		585216
		585217
		585218
		585219
		585220
		585221
		585222
		585223
		585224
		585225
		585226
		585227
		585228
		585229
		585230
		585236
B488_05420	586853..586092	586361
B488_05430	587803..586982	587242
B488_05440	588780..587971	588229
		588230
B488_05460	591105..589570	589866
		590995
		590996
		590997
B488_05470	593347..591227	591872
		592227
		592231
		592561
B488_05480	593547..593798	593740
B488_05490	596436..593848	594116
		594456
		594659
		595023
		595135
		595136
		595137
		595138
		595139
		595140
		595141
		595142
		595143
		595144
		595145
		595146
		595147
		595148
		595149
		595150
		595151
		595152
		595153
		595154
		595155
		595156
		595158
		595159
		595630
B488_05500	597545..596619	596757
		596970
		596971
		596976
		596977
		596978
		596979
		596980
		596981
		596982
		596983
		596986
		596988
		596989
		596993
		597094
B488_05510	597819..598706	597893
		598173
B488_05530	599416..600216	599936
		599943
		599944
		599947
		599950
		599951
		599955
B488_05540	600354..601280	600881
		600882
		600883
		600884
		600885
		600886
		600887
		600888
		600889
		600890
		600891
		600892
		600893
		600894
		600895
		600896
		600897
		600898
		600899
		600900
		600901
		600902
		600903
		600905
		600907
		601095
B488_05550	601465..604053	601497
		601498
		601500
		601503
		601505
		601506
		601507
		601509
		601513
		601516
		602725
		602726
		602727
		602728
		602729
		602855
		602858
		603202
		603751
		604036
		604037
		604038
		604040
		604041
		604042
		604043
		604044
		604045
		604046
		604049
		604050
		604051
		604053
B488_05560	604340..604200	604253
		604304
B488_05590	606802..606062	606732
B488_05600	606990..608213	607210
B488_05610	609484..608216	608873
		609114
		609148
B488_05620	609825..610871	609863
		610593
B488_05630	611277..612569	611602
		612106
		612107
		612108
		612109
		612110
		612111
		612112
		612113
		612114
		612116
		612117
		612118
		612119
		612120
		612121
		612122
		612123
		612124
		612125
		612126
		612127
B488_05640	612580..613287	612733
		612734
		612735
		612736
		612737
		612738
		612739
		612740
		612741
		612742
		612743
		612744
		612745
		612746
		612747
		612748
		612749
		612750
		612751
		612752
		612753
		612754
		612756
B488_05650	613277..614485	613459
		613698
B488_05660	615500..614532	614549
		614554
		615469
		615470
		615471
B488_05670	615647..617299	615646
		616513
		616933
B488_05680	617892..617422	617820
		617821
		617822
B488_05690	618269..621589	618495
		618496
		618497
		618498
		618499
		618500
		618501
		618502
		618503
		618504
		618505
		618506
		618507
		618508
		618509
		618510
		618511
		618512
		618513
		618514
		618515
		618517
		619585
		620793
B488_05710	623782..623015	623042
		623467
B488_05720	624861..624142	624817
B488_05740	626433..629942	627295
		627801
		628414
		629779
B488_05750	630100..632070	630258
		631852
		631951
		631952
		631954
B488_05770	633166..634137	633961
B488_05780	634587..634117	634327
B488_05790	635674..634589	635322
		635423
B488_05800	636780..635722	636165
		636315
		636316
		636317
B488_05810	637526..636969	637160
		637449
B488_05820	638973..637771	637795
		638718
		638719
		638720
		638721
		638722
		638723
		638724
		638725
		638726
		638727
		638728
		638729
		638730
		638732
		638733
		638734
		638735
		638736
		638738
		638739
		638742
B488_05830	640939..638993	639288
		639289
		639290
		639291
		639292
		639293
		639294
		639295
		639296
		639297
		639298
		639299
		639300
		639301
		639302
		639303
		639307
		639308
		639311
		639838
		640714
		640769
B488_05840	641090..642553	641234
		641235
		641487
		641576
		641577
		641578
		641579
		641580
		641581
		641582
		641583
		641584
		641585
		641586
		641587
		641588
		641589
		641590
		641591
		641592
		641593
		641594
		641595
		641596
		641597
		641598
		641599
		641600
		641601
B488_05850	642865..644565	643185
		643417
B488_05860	645139..644786	644946
B488_05870	646687..645572	645675
		645710
B488_05890	647717..648307	647746
		647900
B488_05900	649534..648566	649282
B488_05920	651657..650935	651380
		651381
		651382
		651383
B488_05930	652716..653363	653028
B488_05940	653566..654483	654119
		654120
B488_05960	655392..656720	655423
		656439
		656441
		656623
B488_05970	656794..658425	656911
B488_05980	658717..659661	658811
B488_05990	659891..660757	659902
		660019
		660102
		660225
		660560
		660561
B488_06000	660751..662426	661279
		661526
B488_06010	662488..664644	662645
		663667
B488_06020	666518..665199	666069
B488_06040	667066..668115	667249
B488_06060	669941..668895	669305
		669306
		669307
		669308
		669309
		669310
		669311
		669312
		669313
		669314
		669315
		669316
		669317
		669318
		669319
		669320
		669321
		669322
		669323
		669324
		669325
		669326
		669327
		669328
		669329
B488_06070	671220..670429	671132
B488_06090	673508..672510	672611
B488_06100	674506..673505	674353
B488_06110	675321..674503	675238
B488_06130	677201..676401	676825
B488_06140	678349..677294	677491
B488_06150	679418..678369	678737
		679074
B488_06160	679567..680136	679577
B488_06170	681994..680142	680220
B488_06190	682995..683504	683335
B488_06210	685500..684907	685255
B488_06220	686848..686171	686652
B488_06240	688331..689065	688992
B488_06270	691410..691093	691138
		691140
		691142
		691143
		691144
B488_06280	691440..691799	691555
B488_06290	692003..692407	692203
		692221
B488_06350	696429..696938	696820
B488_06360	697067..698140	697720
B488_06390	700105..701013	700655
B488_06400	702525..701030	701917
		701944
B488_06410	703993..702539	703521
B488_06440	711723..705865	706450
		708264
		708265
		709180
B488_06450	712428..714438	713238
		713239
		713240
		713241
		713242
		713243
		713244
		713245
		713246
		713247
		713248
		713249
		713250
		713251
		713252
		713253
		713254
		713255
		713256
		713257
		713258
		713259
		713260
		713261
		713262
		713263
B488_06460	716444..714471	714730
B488_06480	717668..718858	718042
B488_06530	721992..723167	722638
B488_06540	723146..724354	723669
		724103
B488_06570	727670..725466	727017
		727411
B488_06590	729005..732433	730479
		731584
		732242
B488_06600	733072..732593	732927
B488_06610	735283..733636	734603
B488_06620	735796..736521	736404
B488_06680	742076..739911	740634
		740635
B488_06700	742662..743498	743037
		743054
		743055
		743065
		743066
		743067
		743068
		743069
		743070
		743071
		743072
		743074
		743075
		743076
		743077
		743078
		743086
		743292
		743303
B488_06720	744242..745921	744295
		744301
		744757
		744758
		744759
		744760
		744761
		744762
		744763
		744764
		744765
		744766
		744767
		744768
		744769
		744770
		744771
		744772
		744773
		744774
		744775
		744776
		744777
		744778
		744779
		744781
		745684
		745769
		745770
		745771
		745772
		745773
		745774
		745775
		745776
		745777
		745778
		745779
		745780
		745781
		745782
		745783
		745784
		745785
		745786
		745787
		745788
		745789
		745790
		745791
		745792
		745793
		745794
B488_06740	747844..746217	746969
		747364
B488_06750	748015..749241	748118
		748597
		749034
		749035
		749038
		749042
		749043
		749044
		749045
		749046
		749047
		749048
		749056
		749060
		749063
		749064
B488_06790	753921..752980	753068
		753069
B488_06810	758680..755161	755344
		756617
		756994
		756995
		756996
		756997
		756998
		757000
		757002
		757458
		757551
		757670
B488_06830	759054..761155	759176
		759385
		759773
		760225
B488_06840	762462..761302	761925
B488_06870	765561..763735	764844
B488_06890	767993..767061	767670
B488_06930	772329..770143	771141
		771203
B488_06950	773164..773748	773265
B488_06960	774557..773944	774114
B488_06980	776540..775500	776499
		776500
B488_06990	777671..776706	777213
		777214
		777215
		777216
		777217
		777218
		777219
		777220
		777221
		777222
		777223
		777224
		777225
		777226
		777227
		777228
		777229
		777230
		777231
		777232
		777233
		777234
		777235
		777236
		777238
		777595
B488_07000	777780..777664	777746
B488_07010	778622..777777	778203
		778344
B488_07050	782703..785960	783184
		783400
		783639
		784665
		784828
		784829
		784830
		784831
		784832
		784833
		784834
		784835
		784836
		784837
		784838
		784839
		784840
		784841
		784842
		784843
		784844
		784845
		784846
		784847
		784848
		784849
		784854
B488_07060	786208..787233	786627
B488_07090	790286..789334	789904
B488_07100	791710..790283	790727
B488_07110	792831..791710	792039
		792140
		792705
B488_07120	793995..792838	792929
		793766
		793768
		793770
B488_07130	795407..793989	794541
		794558
B488_07140	796512..795412	795460
		796258
B488_07150	797979..796552	797283
B488_07160	799304..797976	798451
		798456
		798951
B488_07170	801132..799531	799898
		799924
		800499
B488_07180	801715..801278	801301
B488_07190	802736..801717	801732
B488_07220	804183..805223	804224
B488_07230	805220..806242	805851
		805853
		805925
B488_07240	806318..808435	806846
		806847
		806851
		808317
B488_07260	809335..810360	809406
		810290
		810339
B488_07280	811402..812325	811643
B488_07300	814046..815713	815171
		815689
		815742
B488_07310	816308..815772	815986
		816062
B488_07330	817571..817020	817023
B488_07340	817925..817665	817844
B488_07350	818723..817974	818695
B488_07370	822010..820616	821833
B488_07380	822662..822114	822170
		822371
		822372
		822661
B488_07400	825055..823652	824279
		824958
B488_07410	826343..825162	825713
B488_07430	830275..829370	829488
B488_07440	831477..830281	831424
		831455
B488_07450	832464..831502	832012
B488_07460	833747..832581	833054
		833161
		833189
		833190
		833191
		833192
		833193
		833195
B488_07490	837266..835413	835563
		835696
		835946
		836387
		836416
		836818
		836819
B488_07530	839689..838700	839262
B488_07540	840777..839686	840300
		840702
B488_07550	840852..841787	841000
		841526
B488_07600	843572..845116	844829
		844830
B488_07630	846049..846765	846121
B488_07690	849123..848827	849116
		849117
		849118
		849119
		849120
		849121
		849122
		849123
B488_07700	849617..849126	849126
		849127
		849128
		849129
		849130
		849131
		849132
		849133
		849134
		849135
		849136
		849137
		849138
		849139
		849140
		849141
		849142
		849143
		849144
B488_07710	850544..849699	849750
B488_07720	851067..850693	851024
B488_07730	852374..851202	851218
		851492
		851518
		851519
		851520
		851521
		851522
		851523
		851524
		851525
		851526
		851527
		851528
		851529
		851530
		851531
		851532
[truncated: 1,594 more rows]
