# Supplementary material for: Identification of the Genes Required for the Culture of Liberibacter crescens, the Closest Cultured Relative of the Liberibacter Plant Pathogens
Source: Front Microbiol. 2016 Apr 20;7:547. doi: 10.3389/fmicb.2016.00547 (PMC4837290; doi:10.3389/fmicb.2016.00547)
Supplement: Supplementary file 7 [file Table7.xlsx]

## Sheet: S7
Supplemental Table S7: Candidate essential genes that encode homologous proteins in Lso.
Candidate Essential Genes found in Lso	Gene Annotation	Lso homologs	Las homologs
B488_00050	DNA polymerase III delta subunit	DJ66_0884	CLIBASIA_03475
B488_00060	hypothetical protein	CKC_01375	CLIBASIA_03470
B488_00080	hypothetical protein	CKC_01365	CLIBASIA_03460
B488_00170	Ribonuclease HI (RnhA)	CKC_01340	CD16_02230
B488_00270	hypothetical protein	CKC_01310	-
B488_00290	Transcription termination protein (NusA)	CKC_01300	CLIBASIA_03395
B488_00310	Ribosome-binding factor A	CKC_01290	CLIBASIA_03385
B488_00330	SSU ribosomal protein S15p (S13e)	CKC_01285	CLIBASIA_03380
B488_00400	SSU ribosomal protein S2p (SAe)	CKC_01230	CLIBASIA_03350
B488_00440	Undecaprenyl pyrophosphate synthetase	CKC_01210	CLIBASIA_03330
B488_00450	Phosphatidate cytidylyltransferase	CKC_01205	CLIBASIA_03325
B488_00490	(3R)-hydroxymyristoyl-(acyl carrier protein) dehydratase	CKC_01185	CLIBASIA_03305
B488_00500	Acyl-(acyl-carrier-protein)--UDP-N-acetylglucosamine O-acyltransferase	CKC_01180	CLIBASIA_03300
B488_00510	hypothetical protein	CKC_01175	CLIBASIA_03295
B488_00550	3-deoxy-manno-octulosonate cytidylyltransferase	CKC_01160	CLIBASIA_03280
B488_00580	hypothetical protein	CKC_01140	CLIBASIA_03260
B488_00680	tRNA (adenine37-N(6))-methyltransferase (TrmN6)	CKC_00845	CD16_02450
B488_00780	two component response regulator	CKC_01590	CLIBASIA_01805
B488_00840	Cytochrome O ubiquinol oxidase subunit IV	CKC_01615	CLIBASIA_01780
B488_00870	Translation initiation factor 1	CKC_01620	CLIBASIA_01775
B488_00890	hypothetical protein	CKC_01625	CLIBASIA_01770
B488_00910	Exodeoxyribonuclease VII small subunit	CKC_01635	CLIBASIA_01760
B488_00940	Modification methylase	CKC_01645	CLIBASIA_01755
B488_01060	Enoyl-(acyl-carrier-protein) reductase (NADH)	CKC_01695	CLIBASIA_01735
B488_01080	3-hydroxydecanoyl-(acyl-carrier-protein) dehydratase	CKC_01705	CLIBASIA_01725
B488_01130	Nicotinate phosphoribosyltransferase	CKC_01735	CLIBASIA_01700
B488_01140	DNA polymerase III beta subunit	CKC_01740	CLIBASIA_01695
B488_01180	putative membrane protein	CKC_01750	CLIBASIA_01685
B488_01260	hypothetical protein	CKC_01790	CLIBASIA_01640
B488_01370	Pyridoxine 5'-phosphate synthase	CKC_01815	CLIBASIA_01615
B488_01380	SSU ribosomal protein S21p	CKC_01820	CLIBASIA_01610
B488_01480	Dihydroorotate dehydrogenase	CKC_01840	CLIBASIA_01595
B488_01540	NifU-like domain protein	CKC_01860	CLIBASIA_01575
B488_01580	metal-dependent hydrolase	CKC_01885	CLIBASIA_01560
B488_01620	S-adenosylmethionine synthetase	CKC_01905	CLIBASIA_01540
B488_01660	hypothetical protein	CKC_01925	CLIBASIA_01530
B488_01730	4Fe-4S ferredoxin, iron-sulfur binding protein	CKC_01950	CLIBASIA_01505
B488_01830	Flagellar motor switch protein (FliN)	CKC_00525	CLIBASIA_02875
B488_02110	Argininosuccinate lyase	CKC_00440	CLIBASIA_01275
B488_02120	Electron transfer flavoprotein, alpha subunit	CKC_00435	CLIBASIA_01270
B488_02170	Flavodoxin reductases (ferredoxin-NADPH reductases) family 1 protein	CKC_02130	CLIBASIA_01240
B488_02190	LSU ribosomal protein L32p	CKC_02140	CLIBASIA_01230
B488_02350	Tetraacyldisaccharide 4'-kinase	CKC_02185	CLIBASIA_01430
B488_02380	Dimethyladenosine transferase	CKC_02200	CLIBASIA_01415
B488_02390	4-hydroxythreonine-4-phosphate dehydrogenase	CKC_02205	CLIBASIA_01410
B488_02420	putative permease	CKC_02220	CLIBASIA_01395
B488_02450	DNA polymerase III chi subunit	CKC_02235	CLIBASIA_01380
B488_02460	Nucleoside diphosphate kinase	CKC_02240	CLIBASIA_01375
B488_02550	Heat shock protein 60 family co-chaperone GroES	CKC_04900	CLIBASIA_03715
B488_02560	Heat shock protein 60 family chaperone GroEL	CKC_04895	CLIBASIA_03720
B488_02620	NADH-ubiquinone oxidoreductase chain F	CKC_04865	CLIBASIA_03765
B488_02660	NADH-ubiquinone oxidoreductase chain J	CKC_04840	CLIBASIA_03785
B488_02730	Prolyl-tRNA synthetase	CKC_04805	CLIBASIA_03825
B488_02750	Lipoprotein releasing system ATP-binding protein	CKC_04795	CLIBASIA_03840
B488_02760	3-demethylubiquinone-9 3-methyltransferase	CKC_04790	CLIBASIA_03845
B488_02850	Superoxide dismutase (Fe)	CKC_02850	CLIBASIA_01910
B488_02950	Enoyl-(acyl-carrier-protein) reductase (NADH)	CKC_04005	CLIBASIA_05365
B488_02970	Glutamate--cysteine ligase	CKC_03990	CLIBASIA_05340
B488_03170	Replicative DNA helicase	CKC_02475	CLIBASIA_01085
B488_03200	SSU ribosomal protein S18p	CKC_02485	CLIBASIA_01075
B488_03210	SSU ribosomal protein S6p	CKC_02490	CLIBASIA_01070
B488_03320	5-methyl-dCTP pyrophosphohydrolase	CKC_02510	CLIBASIA_01050
B488_03340	hypothetical protein	CKC_00045	-
B488_03430	Crossover junction endodeoxyribonuclease (RuvC)	CKC_05685	CLIBASIA_02205
B488_03550	NADH:ubiquinone oxidoreductase 17.2 kD subunit	CKC_05635	CLIBASIA_02150
B488_03560	Retrovirus-related POL polyprotein	CKC_05630	CLIBASIA_02145
B488_03590	ATP-dependent Clp protease proteolytic subunit	CKC_05425	CLIBASIA_00785
B488_03610	Outer membrane lipoprotein (OmlA)	CKC_02825	CLIBASIA_01935
B488_03630	Phosphate:acyl-ACP acyltransferase (PlsX)	CKC_02835	CLIBASIA_01925
B488_03830	Single-stranded DNA-binding protein	CKC_05180	CLIBASIA_00330
B488_03900	hypothetical protein	CKC_03835	CLIBASIA_04580
B488_04040	DNA topoisomerase I	CKC_02610	CLIBASIA_00955
B488_04050	SSU ribosomal protein S12p (S23e)	CKC_05395	CLIBASIA_00755
B488_04060	SSU ribosomal protein S7p (S5e)	DJ66_0576	CLIBASIA_00750
B488_04090	SSU ribosomal protein S10p (S20e)	CKC_05370	CLIBASIA_00735
B488_04120	LSU ribosomal protein L23p (L23Ae)	CKC_05355	CLIBASIA_00720
B488_04130	LSU ribosomal protein L2p (L8e)	CKC_05350	CLIBASIA_00715
B488_04150	LSU ribosomal protein L22p (L17e)	CKC_05340	CLIBASIA_00705
B488_04170	LSU ribosomal protein L16p (L10e)	CKC_05330	CLIBASIA_00695
B488_04180	LSU ribosomal protein L29p (L35e)	CKC_05325	CLIBASIA_00690
B488_04190	SSU ribosomal protein S17p (S11e)	CKC_05320	CLIBASIA_00685
B488_04200	LSU ribosomal protein L14p (L23e)	CKC_05315	CLIBASIA_00680
B488_04230	SSU ribosomal protein S14p (S29e)	CKC_05300	CLIBASIA_00665
B488_04240	SSU ribosomal protein S8p (S15Ae)	CKC_05295	CLIBASIA_00660
B488_04250	LSU ribosomal protein L6p (L9e)	CKC_05290	CLIBASIA_00655
B488_04280	LSU ribosomal protein L30p (L7e)	CKC_05275	CLIBASIA_00640
B488_04290	LSU ribosomal protein L15p (L27Ae)	CKC_05270	CLIBASIA_00635
B488_04310	Adenylate kinase	CKC_05260	CLIBASIA_00625
B488_04320	SSU ribosomal protein S13p (S18e)	CKC_05255	CLIBASIA_00620
B488_04330	SSU ribosomal protein S11p (S14e)	CKC_05250	CLIBASIA_00615
B488_04340	DNA-directed RNA polymerase alpha subunit	CKC_05245	CLIBASIA_00610
B488_04350	LSU ribosomal protein L17p	CKC_05240	CLIBASIA_00605
B488_04370	DNA repair protein RadC	CKC_04675	WSI_03820
B488_04490	LSU ribosomal protein L31p	CKC_05100	CLIBASIA_00395
B488_04520	Alanyl-tRNA synthetase	CKC_05080	CLIBASIA_00380
B488_04630	CTP synthase	CKC_04370	CLIBASIA_00400
B488_04640	Isocitrate dehydrogenase (NADP)	CKC_04365	CLIBASIA_04005
B488_05240	tRNA:Cm32/Um32 methyltransferase	CKC_04355	CLIBASIA_04015
B488_05250	Glutamate racemase	CKC_04350	CLIBASIA_04020
B488_05300	YrbA protein	CKC_04325	CLIBASIA_04350
B488_05340	Phosphoribosylformylglycinamidine synthase (PurS)	CKC_04310	CLIBASIA_04365
B488_05370	Ribulose-phosphate 3-epimerase	CKC_04295	CLIBASIA_04380
B488_05390	Electron transfer flavoprotein-ubiquinone oxidoreductase	CKC_04285	CLIBASIA_04630
B488_05450	Deoxyuridine 5'-triphosphate nucleotidohydrolase	CKC_04280	CLIBASIA_04635
B488_05520	tmRNA-binding protein (SmpB)	CKC_05450	CLIBASIA_00800
B488_05700	Tyrosyl-tRNA synthetase	CKC_03070	CLIBASIA_04240
B488_05950	Cell division protein (FtsQ)	CKC_04125	CLIBASIA_05425
B488_06120	Cystine ABC transporter, permease protein	CKC_03670	CLIBASIA_05075
B488_06180	hypothetical protein	CKC_04190	CLIBASIA_05120
B488_06200	GTP-binding and nucleic acid-binding protein (YchF)	CKC_02930	CLIBASIA_00555
B488_06330	Rare lipoprotein A precursor	CKC_03000	CLIBASIA_04170
B488_06340	Thymidylate synthase	CKC_03770	CLIBASIA_04275
B488_06380	Phosphoserine phosphatase	CKC_03745	CLIBASIA_04295
B488_06420	Preprotein translocase subunit (YajC)	CKC_04165	CLIBASIA_05090
B488_06430	Phytoene synthase	CKC_04590	CLIBASIA_00220
B488_06470	Cold shock protein (CspG)	CKC_03300	CLIBASIA_04060
B488_06500	Orotate phosphoribosyltransferase	CKC_03845	CLIBASIA_04565
B488_06510	Dihydroorotase	CKC_03840	CLIBASIA_04570
B488_06580	Outer membrane lipoprotein omp16 precursor	CKC_03785	CLIBASIA_04260
B488_06650	putative pilus subunit protein	CKC_00735	CLIBASIA_03100
B488_06670	Transport protein	CKC_04335	CLIBASIA_04340
B488_06820	hypothetical protein	CKC_03055	CLIBASIA_04225
B488_06860	hypothetical protein	CKC_03045	CLIBASIA_04215
B488_06880	N-acetylglucosamine-1-phosphate uridyltransferase / Glucosamine-1-phosphate N-acetyltransferase	CKC_03035	CLIBASIA_04205
B488_06900	Ribonuclease III	CKC_03025	CLIBASIA_04195
B488_06910	Signal peptidase I	CKC_03020	CLIBASIA_04190
B488_06920	Holo-(acyl-carrier protein) synthase	CKC_03015	CLIBASIA_04185
B488_06940	DNA-directed RNA polymerase omega subunit	CKC_03010	CLIBASIA_04180
B488_06970	Dihydrodipicolinate reductase	CKC_05475	CLIBASIA_00820
B488_07070	tRNA nucleotidyltransferase	CKC_04160	CLIBASIA_05085
B488_07250	Mevalonate kinase	CKC_03820	CLIBASIA_04595
B488_07320	ATP synthase protein, subunit B	CKC_03435	CLIBASIA_04935
B488_07390	Ribose 5-phosphate isomerase A	CKC_03220	CLIBASIA_04780
B488_07420	2-oxoglutarate dehydrogenase E1 component	CKC_03205	CLIBASIA_04765
B488_07470	Flagellar hook-length control protein FliK	CKC_03180	CLIBASIA_04735
B488_07480	Succinate dehydrogenase iron-sulfur protein	CKC_03175	CLIBASIA_04730
B488_07500	Succinate dehydrogenase hydrophobic membrane anchor protein	CKC_03165	CLIBASIA_04720
B488_07510	Succinate dehydrogenase cytochrome b-556 subunit	CKC_03160	CLIBASIA_04715
B488_07520	hypothetical protein	CKC_03155	CLIBASIA_04710
B488_07560	putative uroporphyrinogen-III synthase protein	CKC_03135	CLIBASIA_04685
B488_08030	Thymidylate kinase	CKC_02955	CLIBASIA_00515
B488_08090	2-amino-4-hydroxy-6-hydroxymethyldihydropteridine pyrophosphokinase	CKC_04245	-
B488_08100	putative dihydroneopterin aldolase	CKC_04250	-
B488_08110	Dihydropteroate synthase	CKC_04255	-
B488_08380	putative acetyltransferase protein	CKC_03995	CLIBASIA_05345
B488_08410	Coproporphyrinogen III oxidase, aerobic	CKC_03595	CLIBASIA_04875
B488_08460	LSU ribosomal protein L10p (P0)	CKC_04995	CLIBASIA_00120
B488_08480	LSU ribosomal protein L11p (L12e)	CKC_05005	CLIBASIA_00130
B488_08490	Transcription antitermination protein (NusG)	CKC_05010	CLIBASIA_00135
B488_08500	Preprotein translocase subunit (SecE)	CKC_05015	CLIBASIA_00140
B488_08660	hypothetical protein	CKC_05065	CLIBASIA_00210
B488_08700	PaaD-like protein	CKC_03275	CLIBASIA_04825
B488_08720	Iron-sulfur cluster assembly protein (SufD)	CKC_03245	CLIBASIA_04815
B488_08730	Iron-sulfur cluster assembly ATPase protein (SufC)	CKC_03235	CLIBASIA_04810
B488_08760	Alpha/beta hydrolase	CKC_03405	CLIBASIA_04975
B488_08870	hypothetical protein	CKC_04645	WSI_00195
B488_09130	DNA-binding protein HU-beta	CKC_02845	CLIBASIA_03175
B488_09170	LSU ribosomal protein L13p (L13Ae)	CKC_05545	CLIBASIA_00885
B488_09180	SSU ribosomal protein S9p (S16e)	CKC_05550	CLIBASIA_00890
B488_09260	Octanoate-(acyl-carrier-protein)-protein-N-octanoyltransferase	CKC_05155	CLIBASIA_00300
B488_09300	putative exported protein	CKC_01655	-
B488_09310	High-affinity iron permease	CKC_01660	-
B488_09350	hypothetical protein	CKC_02735	CLIBASIA_01975
B488_09360	hypothetical protein	CKC_02730	CLIBASIA_01980
B488_09400	Flagellar biosynthesis protein (FliQ)	CKC_02710	CLIBASIA_02030
B488_09410	Flagellar basal-body rod modification protein (FlgD)	CKC_02705	CLIBASIA_02035
B488_09430	flagellin synthesis regulator protein (FlaF)	CKC_02695	CLIBASIA_02045
B488_09550	Aspartate carbamoyltransferase	CKC_02635	CLIBASIA_00925
B488_09650	putative iron binding protein (SufA)	CKC_05515	CLIBASIA_00860
B488_09660	Exodeoxyribonuclease III	CKC_05520	CLIBASIA_00865
B488_09750	(3R)-hydroxymyristoyl-(acyl carrier protein) dehydratase	CKC_01185	CLIBASIA_03305
B488_09790	Aspartyl-tRNA(Asn) amidotransferase subunit C	CKC_03865	CLIBASIA_04390
B488_09830	Kup system potassium uptake protein	CKC_02915	CLIBASIA_03625
B488_09880	RND efflux system, outer membrane lipoprotein CmeC	CKC_04480	CLIBASIA_04145
B488_09890	Histidyl-tRNA synthetase	CKC_04485	CLIBASIA_04135
B488_10050	hypothetical protein	CKC_04515	CLIBASIA_04110
B488_10110	Acyl carrier protein (AcpP)	CKC_05595	CLIBASIA_02105
B488_10130	Malonyl CoA-acyl carrier protein transacylase	CKC_05605	CLIBASIA_02115
B488_10150	Manganese ABC transporter, ATP-binding protein (SitB)	CKC_05615	CLIBASIA_02125
B488_10200	Inorganic pyrophosphatase	CKC_05220	CLIBASIA_00585
B488_10300	hypothetical protein	CKC_04695	CLIBASIA_03960
B488_10310	hypothetical protein	CKC_04700	CLIBASIA_03955
B488_10360	hypothetical protein	CKC_04725	CLIBASIA_03935
B488_10380	Inosine-5'-monophosphate dehydrogenase	CKC_04730	CLIBASIA_03930
B488_10400	hypothetical protein	CKC_04735	CLIBASIA_03910
B488_10460	Tyrosine recombinase (XerC)	CKC_04750	CLIBASIA_03895
B488_10490	Membrane-bound lytic murein transglycosylase B precursor	CKC_02595	CLIBASIA_00965
B488_10570	Response regulator	CKC_02580	CLIBASIA_00985
B488_10640	Phenylalanyl-tRNA synthetase alpha chain	CKC_02555	CLIBASIA_01010
B488_10650	LSU ribosomal protein L20p	CKC_02550	CLIBASIA_01015
B488_10670	Translation initiation factor 3	CKC_02540	CLIBASIA_01025
B488_10690	SAM-dependent methyltransferase, BioC-like protein	CKC_02525	CLIBASIA_01035
B488_10730	Phosphoribosylformylglycinamidine cyclo-ligase	CKC_00060	CLIBASIA_02280
B488_10770	L-proline glycine betaine ABC transport system permease protein (ProV)	CKC_02440	CLIBASIA_01125
B488_10850	6,7-dimethyl-8-ribityllumazine synthase	CKC_02410	CLIBASIA_01155
B488_10860	Riboflavin synthase alpha chain	CKC_02405	CLIBASIA_01160
B488_10890	Serine hydroxymethyltransferase	CKC_02395	CLIBASIA_01170
B488_10950	Citrate synthase (si)	CKC_02370	CLIBASIA_01200
B488_10980	2-Keto-3-deoxy-D-manno-octulosonate-8-phosphate synthase	CKC_02350	CLIBASIA_02780
B488_11000	putative septum formation initiator protein	CKC_02340	CLIBASIA_02790
B488_11060	Putative oligoketide cyclase/dehydratase or lipid transport protein (YfjG)	CKC_02310	CLIBASIA_02820
B488_11170	CDP-diacylglycerol--serine O-phosphatidyltransferase	CKC_00105	CLIBASIA_02325
B488_11290	LSU ribosomal protein L28p	CKC_00130	CLIBASIA_02355
B488_11350	Acetyl-coenzyme A carboxyl transferase alpha chain	CKC_00155	CLIBASIA_02375
B488_11380	hypothetical protein	CKC_00165	CLIBASIA_02385
B488_11500	ABC-type anion transport system, duplicated permease component	CKC_00235	CLIBASIA_02420
B488_11510	25 kDa outer-membrane immunogenic protein precursor	CKC_00240	CLIBASIA_02425
B488_11550	Aspartate aminotransferase	CKC_00265	CLIBASIA_02445
B488_11560	N-acetyl-gamma-glutamyl-phosphate reductase	CKC_05555	CLIBASIA_00895
B488_11640	5-aminolevulinate synthase	CKC_00275	CLIBASIA_02455
B488_11710	RNA polymerase sigma factor (RpoH)	CKC_00305	CLIBASIA_02490
B488_11800	putative ATP synthase delta chain	CKC_00340	CLIBASIA_02525
B488_11890	Ubiquinone/menaquinone biosynthesis methyltransferase (UbiE)	CKC_00375	CLIBASIA_02555
B488_11930	Chromosomal replication initiator protein (DnaA)	CKC_00390	CLIBASIA_02570
B488_11980	Creatinine amidohydrolase	CKC_00410	CLIBASIA_02600
B488_12040	Chaperone protein (DnaJ)	CKC_02100	CLIBASIA_02625
B488_12190	Transketolase (TktA)	CKC_02045	CLIBASIA_02710
B488_12220	5-formyltetrahydrofolate cyclo-ligase	CKC_02040	CLIBASIA_02725
B488_12350	hypothetical protein	CKC_01995	CLIBASIA_01465
B488_12450	Large-conductance mechanosensitive channel	CKC_00560	CLIBASIA_02920
B488_12490	HtrA protease/chaperone protein	CKC_00575	CLIBASIA_02935
B488_12520	Two-component system response regulator (QseB)	CKC_04710	CLIBASIA_03950
B488_12610	Phosphate transport ATP-binding protein (PstB)	CKC_00595	CLIBASIA_02955
B488_12710	tRNA (Guanine37-N1)-methyltransferase	CKC_00645	CLIBASIA_03005
B488_12890	hypothetical protein	CKC_00735	CLIBASIA_03100
B488_12960	putative carboxynorspermidine decarboxylase	CKC_00770	CLIBASIA_03140
B488_12980	Uracil-DNA glycosylase, family 4	CKC_00780	CLIBASIA_03150
B488_13000	Lipopolysaccharide ABC transporter, ATP-binding protein (LptB)	CKC_00785	CLIBASIA_03155
B488_13040	integration host factor beta subunit	CKC_00805	CLIBASIA_03175
B488_13140	Periplasmic thiol:disulfide interchange protein (DsbA)	CKC_01585	CLIBASIA_01810
B488_13180	Deoxycytidine triphosphate deaminase	CKC_01570	CLIBASIA_01825
B488_13200	Ribonuclease P protein component	CKC_01560	CLIBASIA_01835
B488_13230	Acetylglutamate kinase	CKC_01545	WSI_01760
B488_13410	Alcohol dehydrogenase	DJ66_0429	-
B488_13480	ATP-dependent protease (HslV)	CKC_01510	CLIBASIA_03605
B488_13540	Pantothenate kinase	CKC_01505	CLIBASIA_03600
B488_13560	DNA-binding response regulator (ChvI)	CKC_04710	-
B488_13620	ATPase (YjeE)	CKC_01490	CLIBASIA_03585
B488_13700	hypothetical protein	CKC_01445	CLIBASIA_03530
B488_13720	DNA polymerase III epsilon subunit	CKC_01455	CLIBASIA_03545
B488_13750	Septum formation protein (Maf)	CKC_01430	CLIBASIA_03520
B488_13780	Transcription termination factor (Rho)	CKC_01415	CLIBASIA_03505
